# Supplementary material for: Identification of Circular RNA Profiles in the Liver of Diet-Induced Obese Mice and Construction of the ceRNA Network
Source: MDPI journal article supplement (doi:10.3390/genes14030688), 2023-03-10
Supplement: s1 [file s1]

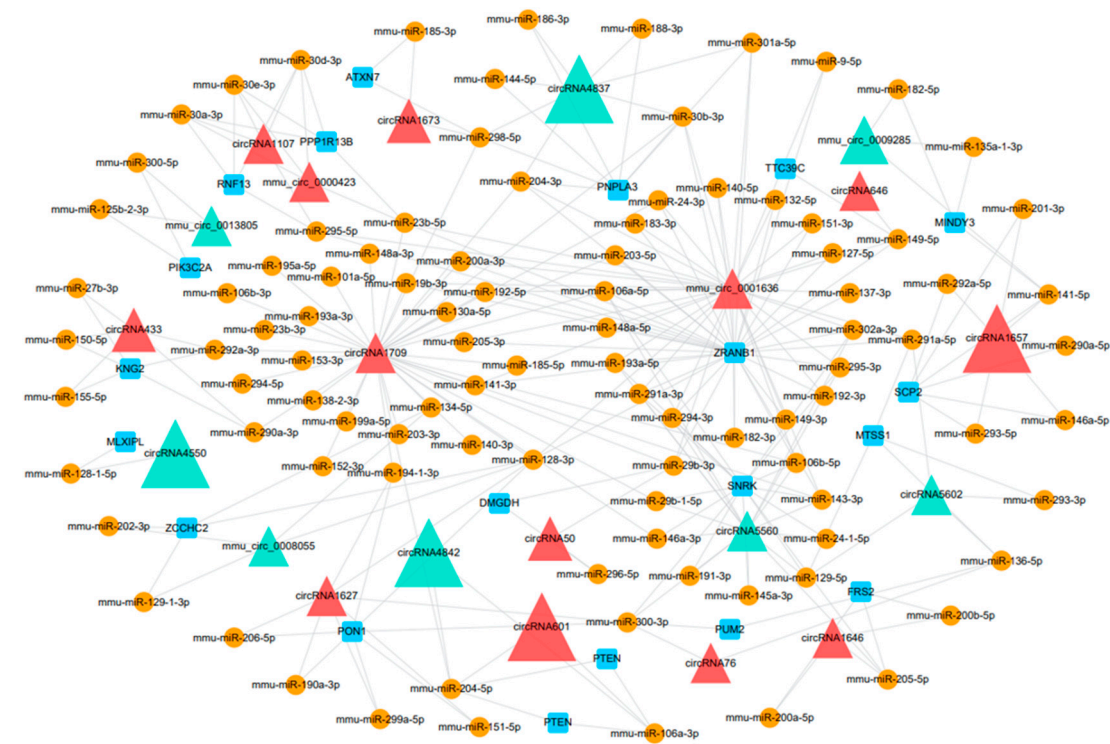

Table S1. The primer sequences of circRNA and GAPDH.

Table S2. Expression profiling of DE circRNAs between the HFD and LFD groups.

|                  |         |      |      |      |
|------------------|---------|------|------|------|
| circRNA5560      | circRNA | -inf | 0.02 | down |
| mmu_circ_0001636 | ciRNA   | inf  | 0.03 | up   |
| circRNA50        | circRNA | inf  | 0.03 | up   |
| mmu_circ_0009285 | circRNA | -inf | 0.03 | down |
| circRNA1673      | circRNA | inf  | 0.03 | up   |
| circRNA433       | circRNA | 3.17 | 0.03 | up   |
| circRNA1627      | circRNA | inf  | 0.03 | up   |
| mmu_circ_0008055 | circRNA | -inf | 0.04 | down |
| mmu_circ_0000423 | circRNA | inf  | 0.04 | up   |
| circRNA646       | circRNA | inf  | 0.04 | up   |
| circRNA1646      | circRNA | inf  | 0.05 | up   |
| mmu_circ_0013805 | circRNA | -inf | 0.05 | down |
| circRNA1107      | circRNA | inf  | 0.05 | up   |
